# Supplementary material for: CircRNA-0100 positively regulates the differentiation of cashmere goat SHF-SCs into hair follicle lineage via sequestering miR-153-3p to heighten the KLF5 expression
Source: Copernicus journal article supplement (doi:10.5194/aab-65-55-2022), 2022-02-22
Supplement: Supplementary file [file aab-65-55-2022-supplement.pdf]

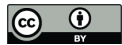

*Supplement of*

**CircRNA-0100 positively regulates the differentiation of cashmere goat SHF-SCs into hair follicle lineage via sequestering miR-153-3p to heighten the KLF5 expression**

**Junyin Zhao et al.**

*Correspondence to:* Wenlin Bai (baiwenlin@syau.edu.cn)

The copyright of individual parts of the supplement might differ from the article licence.

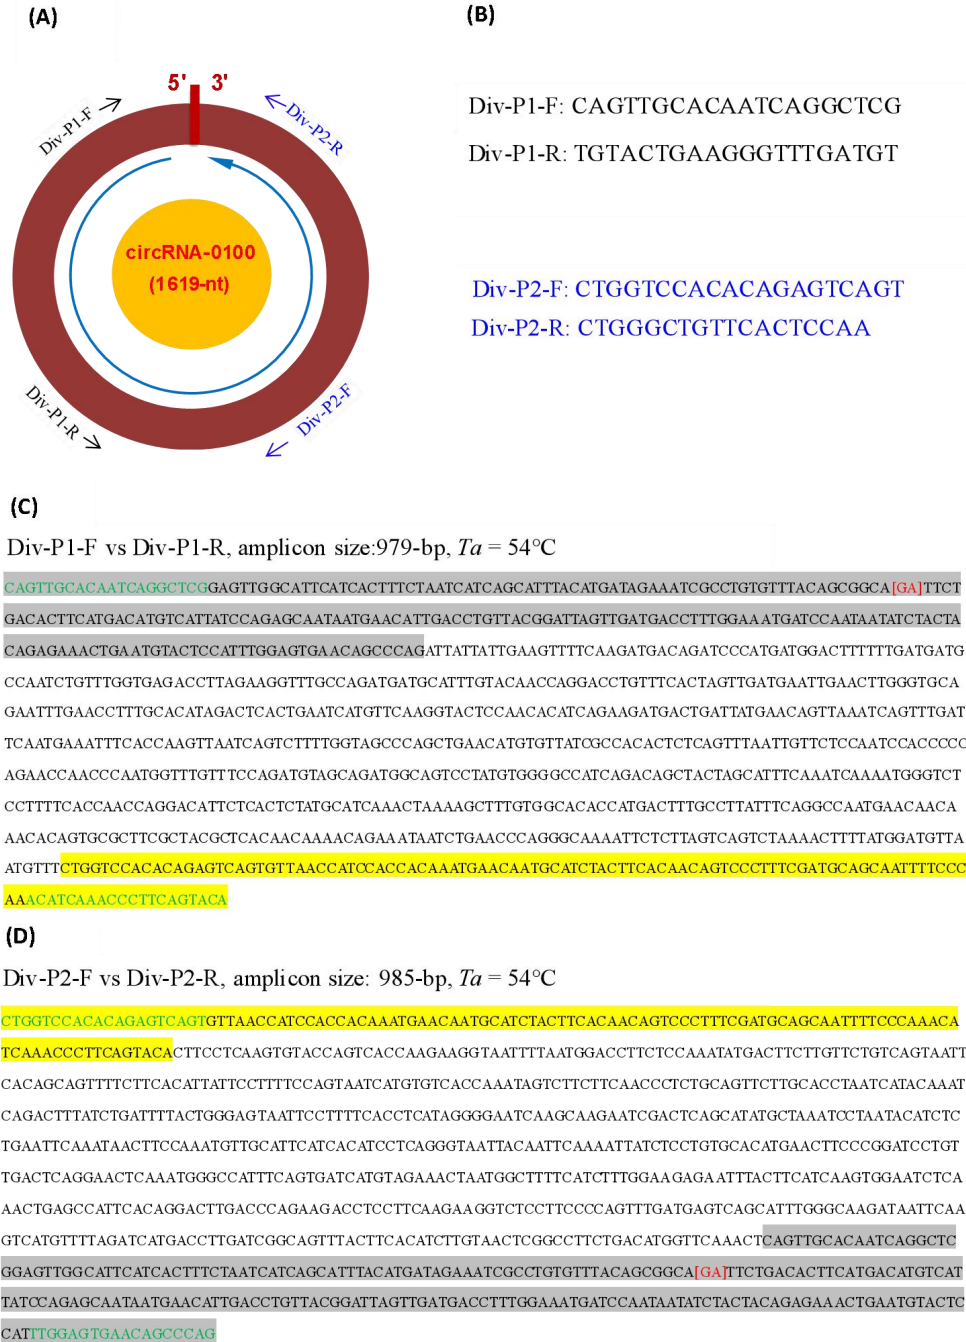

**Fig. S1** Validation of circRNA-0100 in SHFs of cashmere goat by two divergent primers along with amplicon sequencing. (A) The designing scheme of two divergent primer pairs for amplifying the entire length of circRNA-0100 in SHFs of cashmere goat. (B) The primer sequence of two divergent primer pairs: Div-P1-F vs Div-P1-R, and Div-P2-F vs Div-P2-R. (C) The sequencing result of amplicon by Div-P1-F versus Div-P1-R with annealing temperature ( $T_a$ ). The bases of primer location were displayed with green. The back spliced junction [GA] was indicated in square brackets with red. (D) The sequencing result of amplicon using Div-P2-F versus Div-P2-R with annealing temperature ( $T_a$ ). The bases of primer location were displayed with green. The back spliced junction [GA] was indicated in square brackets with red. Between (C) and (D), the overlapping areas of two amplicon sequences were indicated by sharing shaded areas with the same color. Div-P1-F = Divergent Primer 1 Forward, Div-P1-R = Divergent Primer 1 Reverse, Div-P2-F = Divergent Primer 2 Forward, and Div-P2-R = Divergent Primer 2 Reverse.  $T_a$  = annealing temperature.
